# Supplementary material for: Synthesis of organo-layered double hydroxides by an environmentally friendly co-hydration route
Source: Royal Society of Chemistry journal article supplement (doi:10.1039/b706445d), 2007-01-01
Supplement: b706445d.pdf [file b706445d.pdf]

# Synthesis of organo-layered double hydroxides by an environmentally friendly co-hydration route

H. C. Greenwell,<sup>\*a</sup> C. C. Marsden,<sup>b</sup> and W. Jones<sup>c</sup>

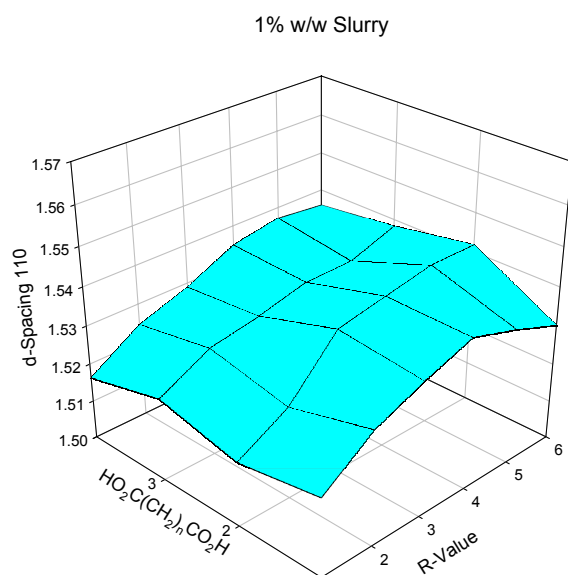

Graph to show the effect of R-value on the position of the (003) reflection for the LDH products with varying acid chain length from 1% w/w slurry

Electronic Supplementary Information
